# Supplementary material for: Exploring Si-centered phthalocyanine as a single atom catalyst for N2O reduction: a DFT study
Source: Royal Society of Chemistry journal article supplement (doi:10.1039/d4cp00832d), 2024-01-01
Supplement: d4cp00832d1.pdf [file d4cp00832d1.pdf]

## **Supplementary Information**

### Exploring Si-Centered Phthalocyanine as a single atom catalyst for N<sub>2</sub>O reduction: a DFT study

Adnan Ali Khan<sup>1\*</sup>, Sarah Abdullah Alsalhi<sup>2\*</sup>, Ata Ur Rahman<sup>3</sup>

<sup>1</sup>Department of Chemistry, University of Malakand, Khyber Pakhtunkhwa, Pakistan

<sup>2</sup>Department of Physics, College of Science, Princess Nourah bint Abdulrahman University,  
P. O. Box 84428, Riyadh 11671, Saudi Arabia

<sup>3</sup>THz Technical Research Center of Shenzhen University, Key Laboratory of Optoelectronic Devices and Systems of Ministry of Education and Guangdong Province, College of Physics and Optoelectronic Engineering, Shenzhen University, Shenzhen, 518060, China

\*Corresponding authors: Email addresses: [aak95287@gmail.com](mailto:aak95287@gmail.com) (A. A. Khan), [saalsalhi@pnu.edu.sa](mailto:saalsalhi@pnu.edu.sa) (S. A. Alsalhi)

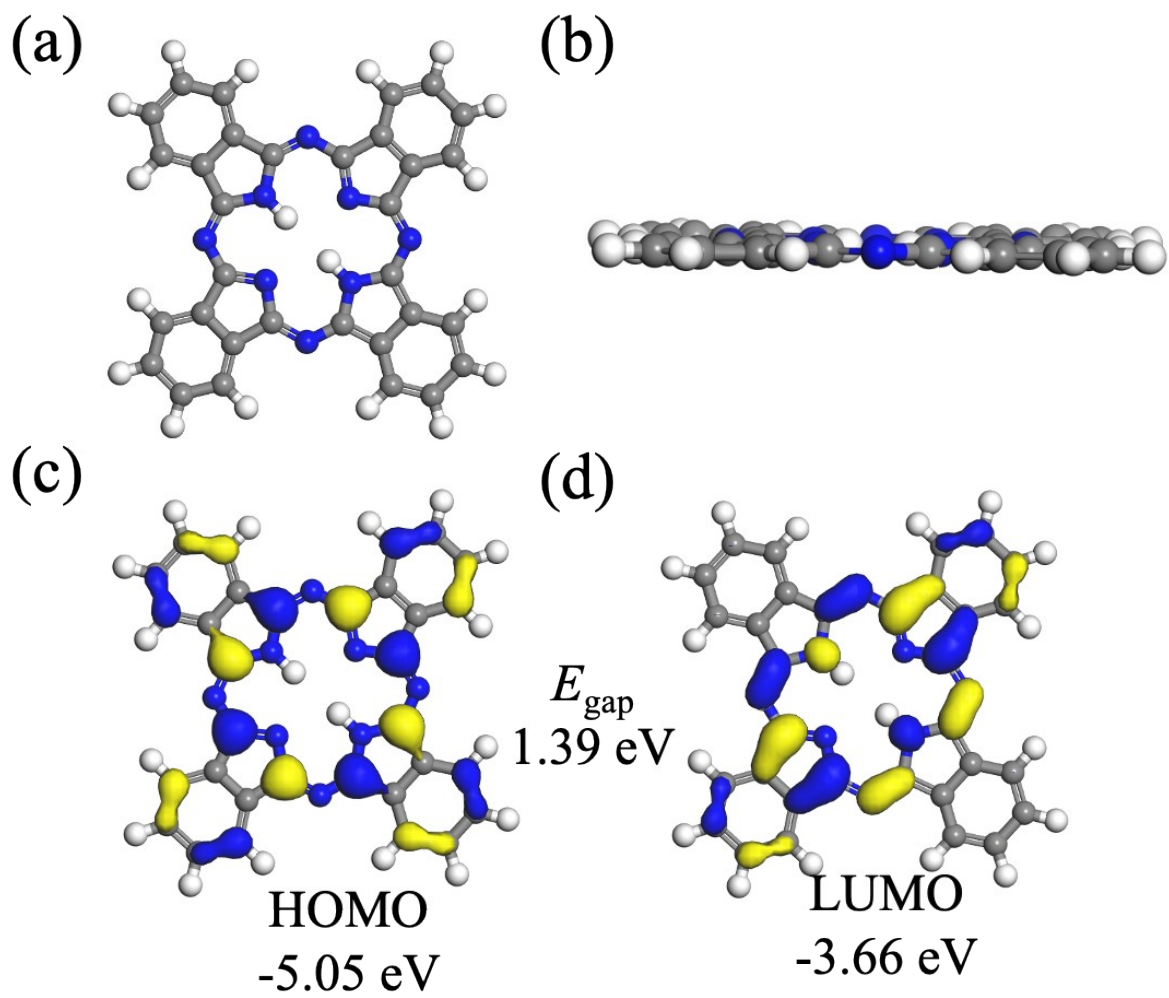

**Figure S1.** Optimized geometry of bare phthalocyanine (a, b), HOMO and LUMO plot of phthalocyanine (c, d)

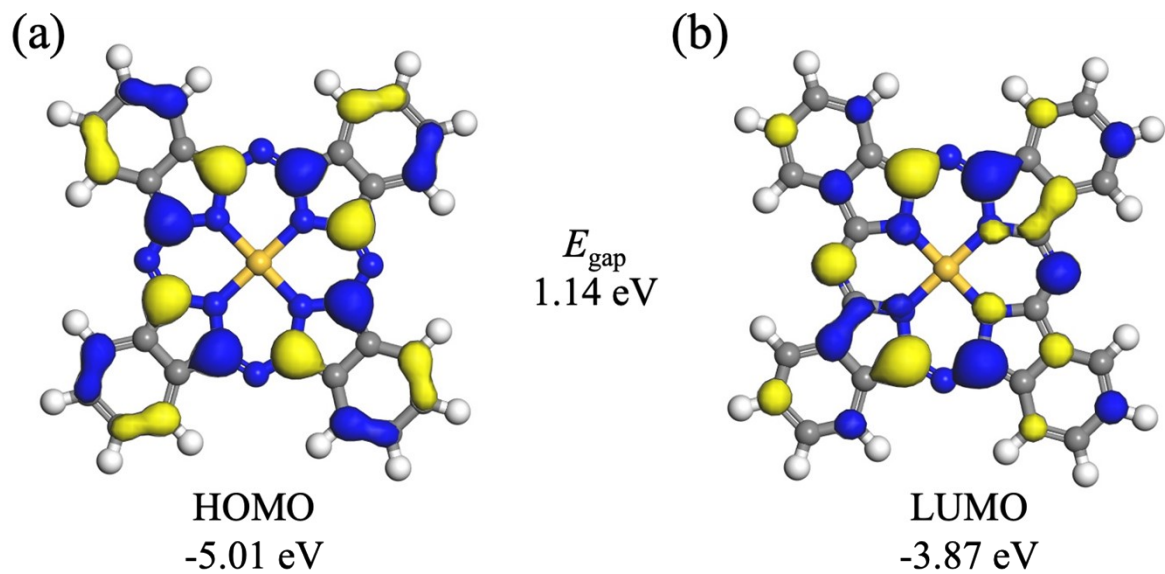

**Figure S2.** HOMO and LUMO plot of Si-decorated phthalocyanine (a, b)

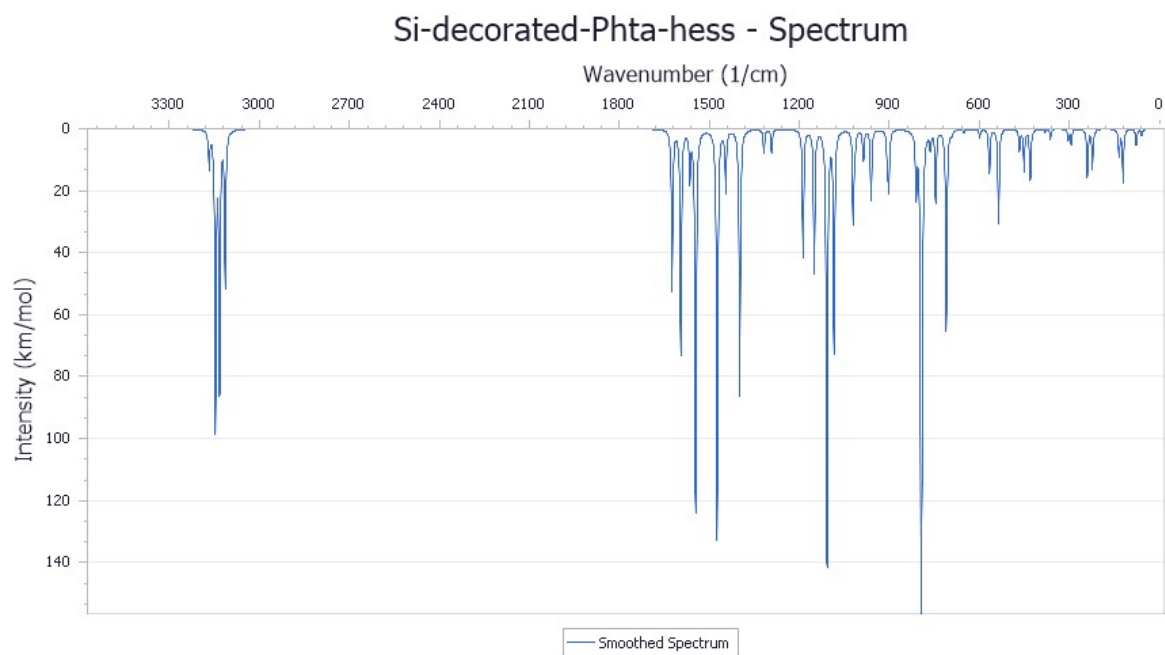

**Figure S3.** Vibrational spectrum of Si-decorated phthalocyanine

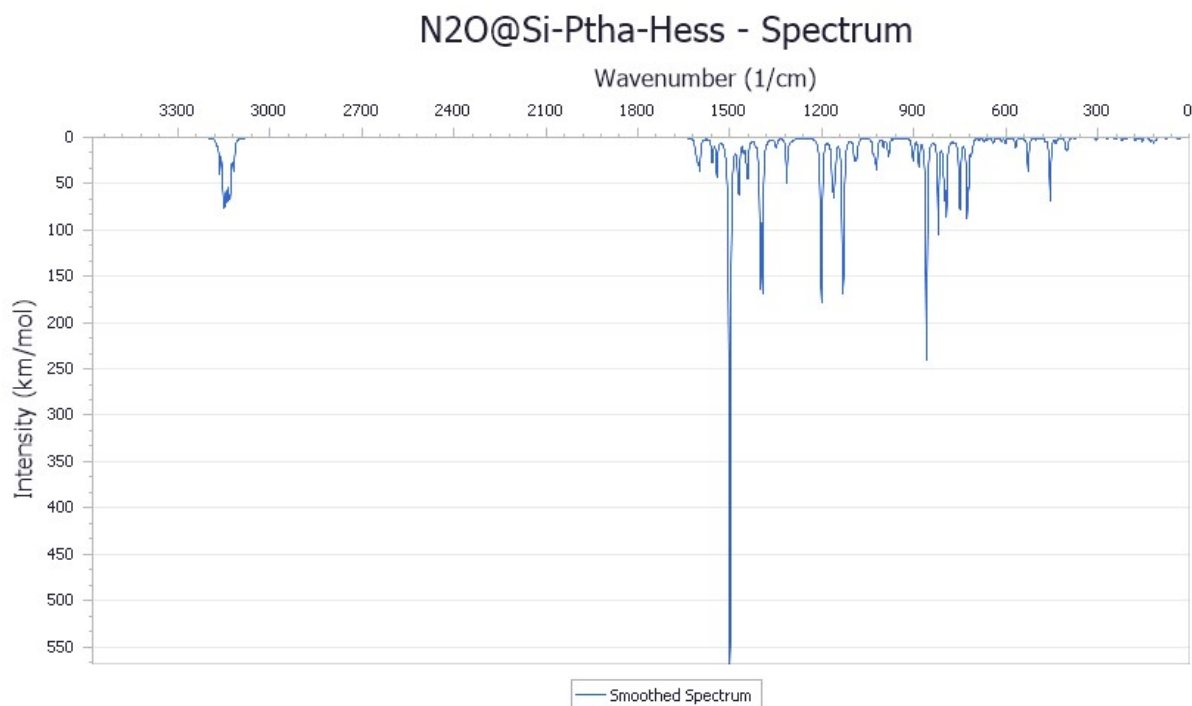

**Figure S4.** Vibrational spectrum of N<sub>2</sub>O-N adsorption over Si-decorated phthalocyanine

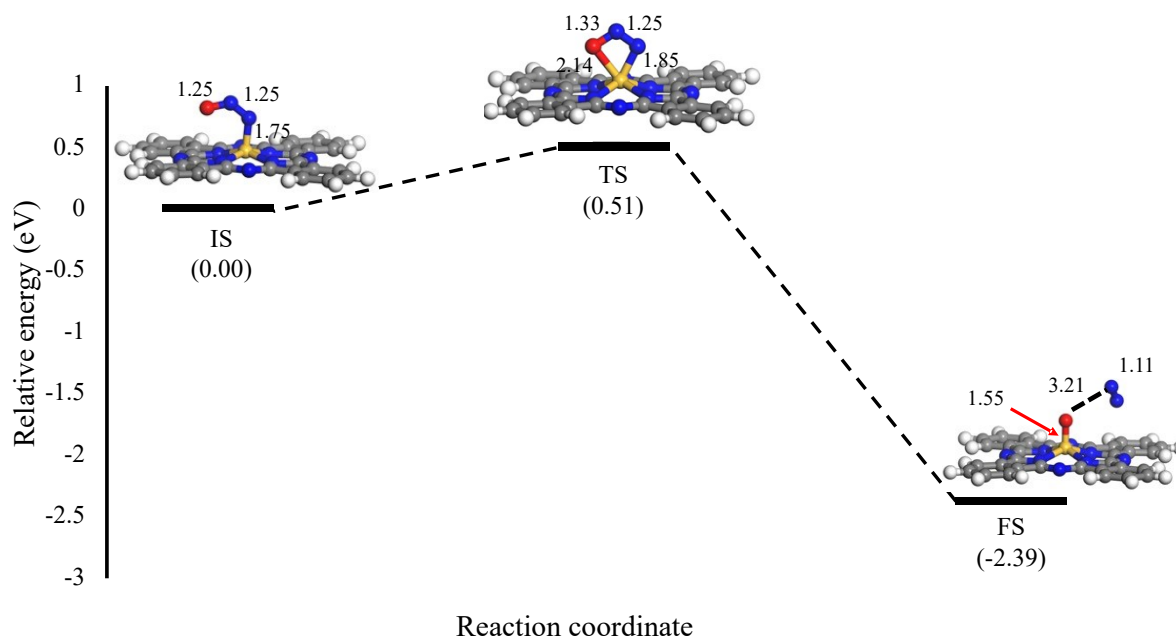

**Figure S5.** Relaxed stationary points for N<sub>2</sub>O → N<sub>2</sub> + O\* reaction onto the Si@PathC catalyst. All bond distances are in Å

To further confirm the N<sub>2</sub>O chemisorption of N<sub>2</sub>O over the catalyst surface from its N-end we computed again the N<sub>2</sub>O adsorption over the surface. This time N<sub>2</sub>O is placed at little different position the geometry relaxation shows that the N<sub>2</sub>O again chemisorbed (as shown in IS in

Figure S5) with adsorption energy value of -1.14 eV, this time the N<sub>2</sub>O molecule bent in upward position compared to N<sub>2</sub>O adsorption from N-end mentioned in the main manuscript.

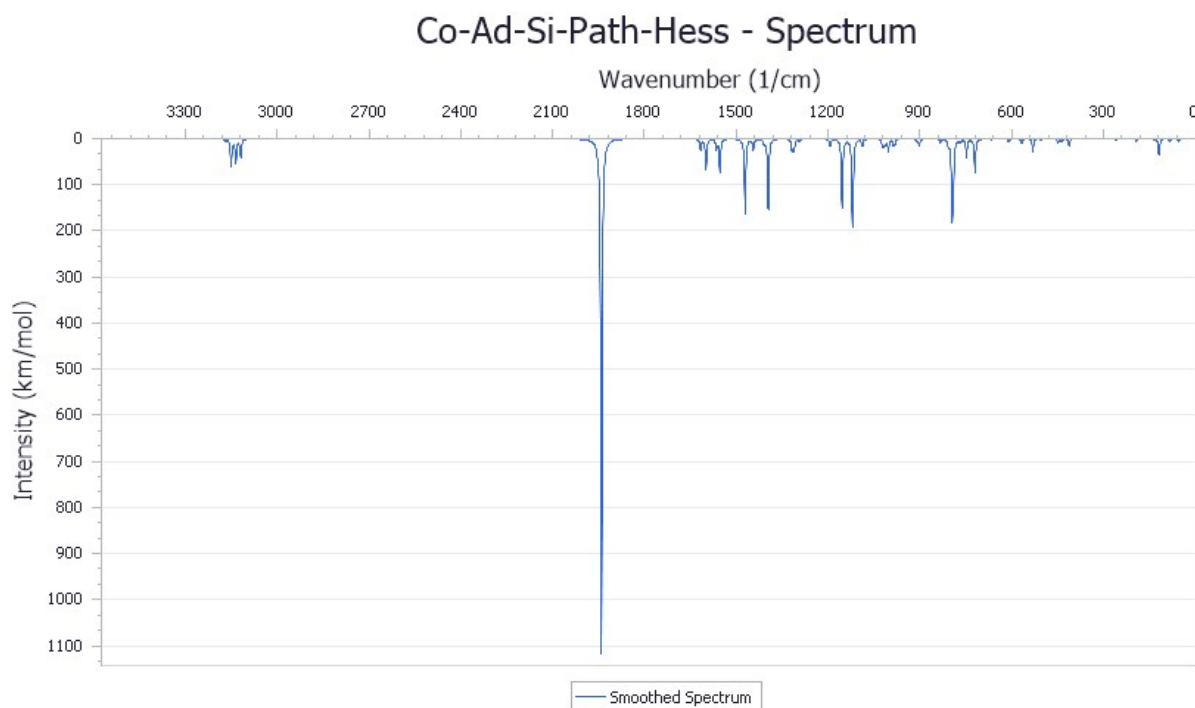

**Figure S6.** Vibrational spectrum of CO adsorption over Si-decorated phthalocyanine

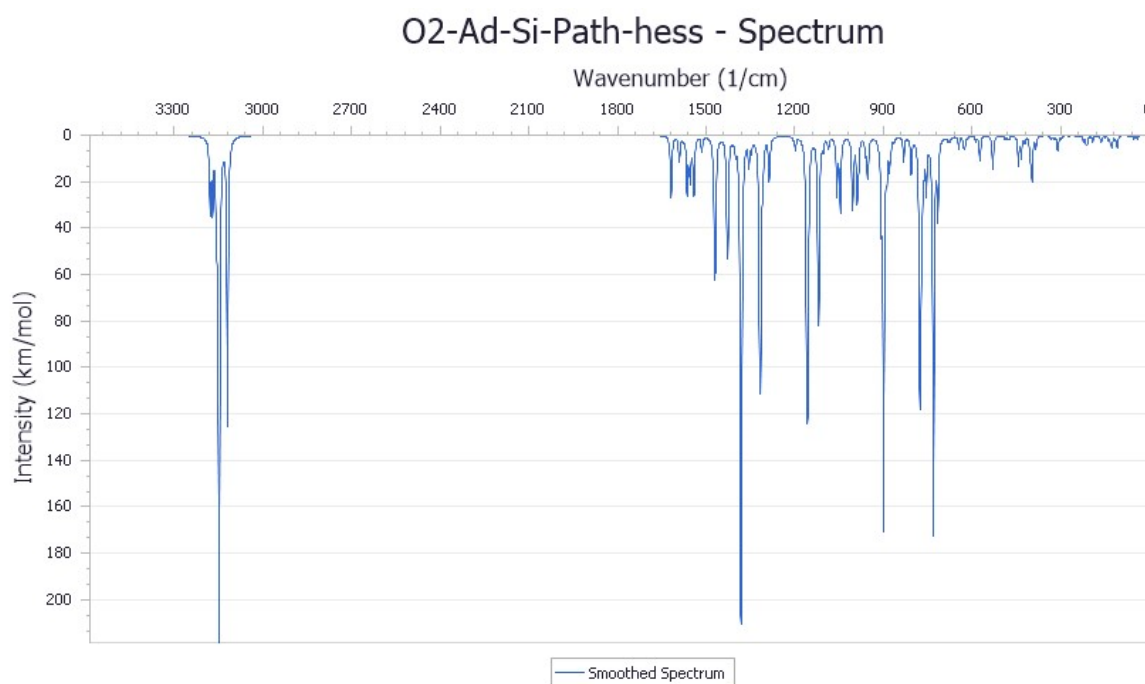

**Figure S7.** Vibrational spectrum of O<sub>2</sub> adsorption over Si-decorated phthalocyanine
